# Supplementary material
Source: PubMed Central journal article supplement (PMC3294311)

Supplementary Table 1: Normal Mendelian distribution of pups born from breeding  $Mtor^{wt/del}$  Podocin-Cre mice to  $Mtor^{flox/flox}$  mice.

Supplementary Figure 1: Mtor protein is reduced in glomeruli from Mtor haploinsufficient mice ( $Mtor^{wt/del}$ )

Supplementary Figure 2: Molecular markers of podocyte differentiation.

- A. Immunostaining for podocin shows similar levels at 2 weeks of age in mutants and controls, but downregulation at 3 weeks of age in mutants, although staining pattern is similar.
- B. At 3 weeks of age, Wilms tumor protein 1 (*Wt1*) and *Nphs1* are not different between mutants and control mice.
- C. Vascular endothelial growth factor A (*Vegfa*) expression in glomeruli. In situ analysis shows that *Vegfa* expression in podocytes is similar in mutants and controls at 2 weeks of age but is downregulated in mutants at 3 weeks of age.

Supplementary Movie:

Human podocyte transfected with LC3-GFP shows accumulation of ringed structures characteristic of autophagosomes upon exposure to rapamycin.

Supplementary table 1: Normal mendelian distribution of pups born from breeding  $Mtor^{wt/del}$  Podocin-Cre mice to  $Mtor^{flax/flax}$  mice.

| Genotype                      | No. of pups | Observed (%) | Expected (%) |
|-------------------------------|-------------|--------------|--------------|
| $Mtor^{flax/del}$ Podocin-Cre | 49          | 22           | 25           |
| $Mtor^{flax/wt}$ Podocin-Cre  | 40          | 27           | 25           |
| Podocin-Cre Negative          | 91          | 51           | 50           |

mTOR flox/wt  
mTOR flox/del

mTOR

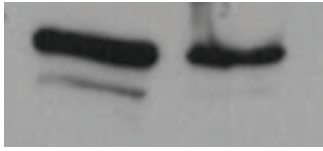

b-actin

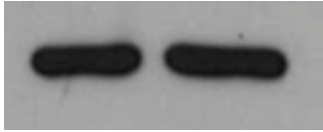

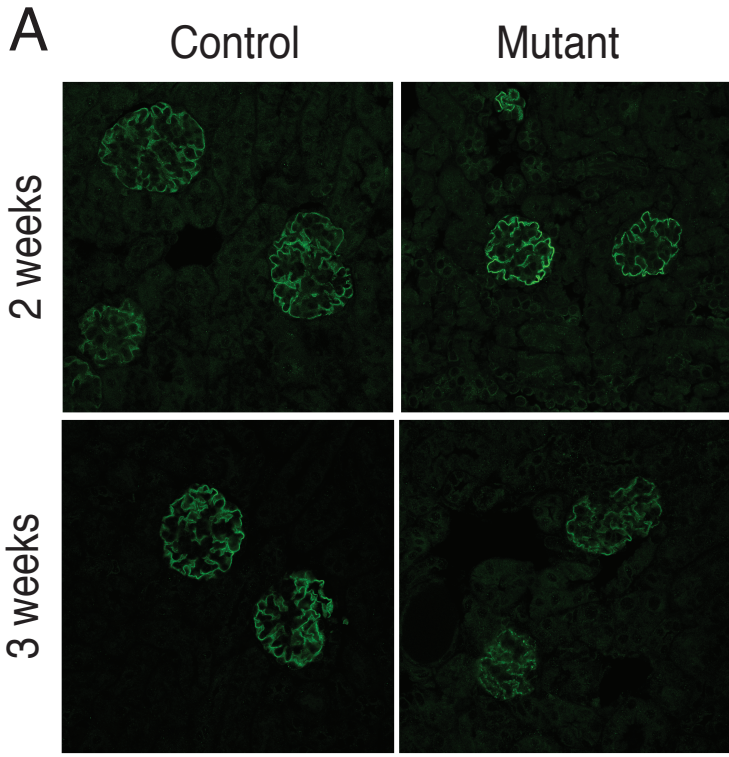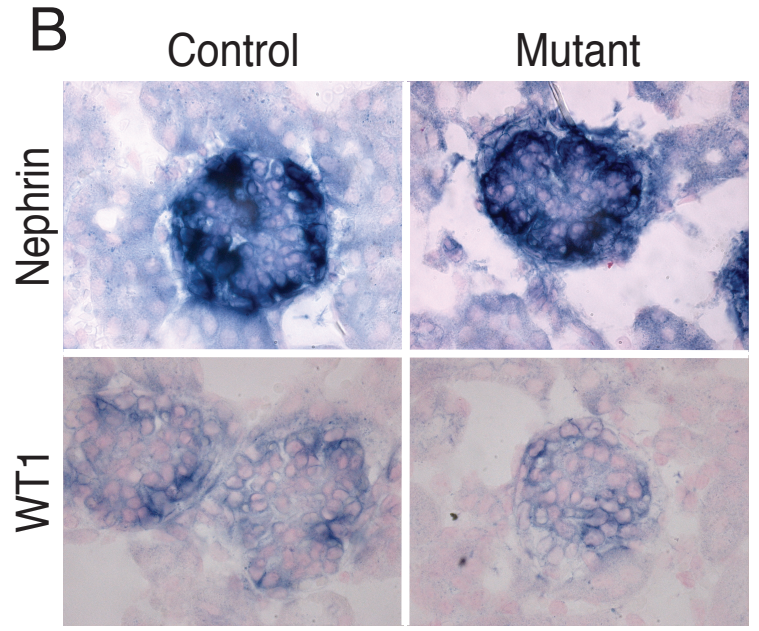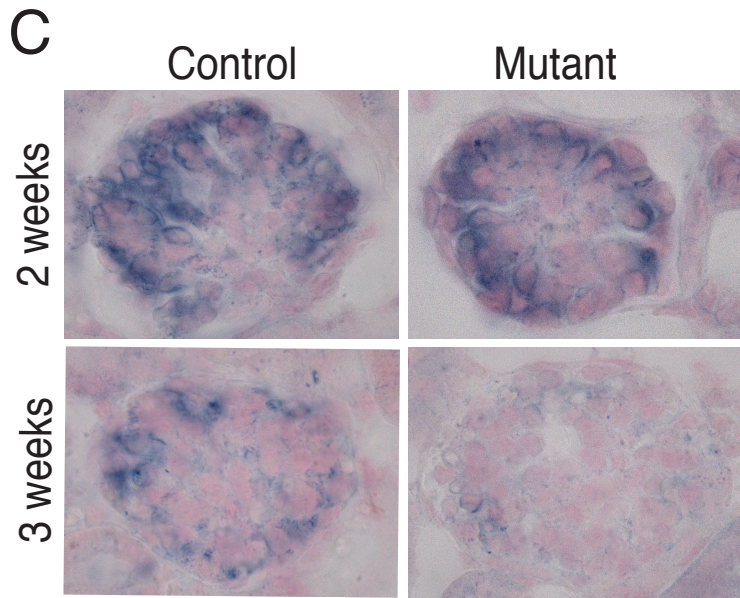

Supplement: ASN.2011070690_ASN2011070690SupplementaryData.pdf [file ASN.2011070690_ASN2011070690SupplementaryData.pdf]
